# Supplementary material for: Glucose- but Not Rice-Based Oral Rehydration Therapy Enhances the Production of Virulence Determinants in the Human Pathogen Vibrio cholerae
Source: PubMed Central journal article supplement (PMC4256474; doi:10.1371/journal.pntd.0003347), 2014-12-04
Supplement: pntd.0003347.s004.pdf [file pntd.0003347.s004.pdf]

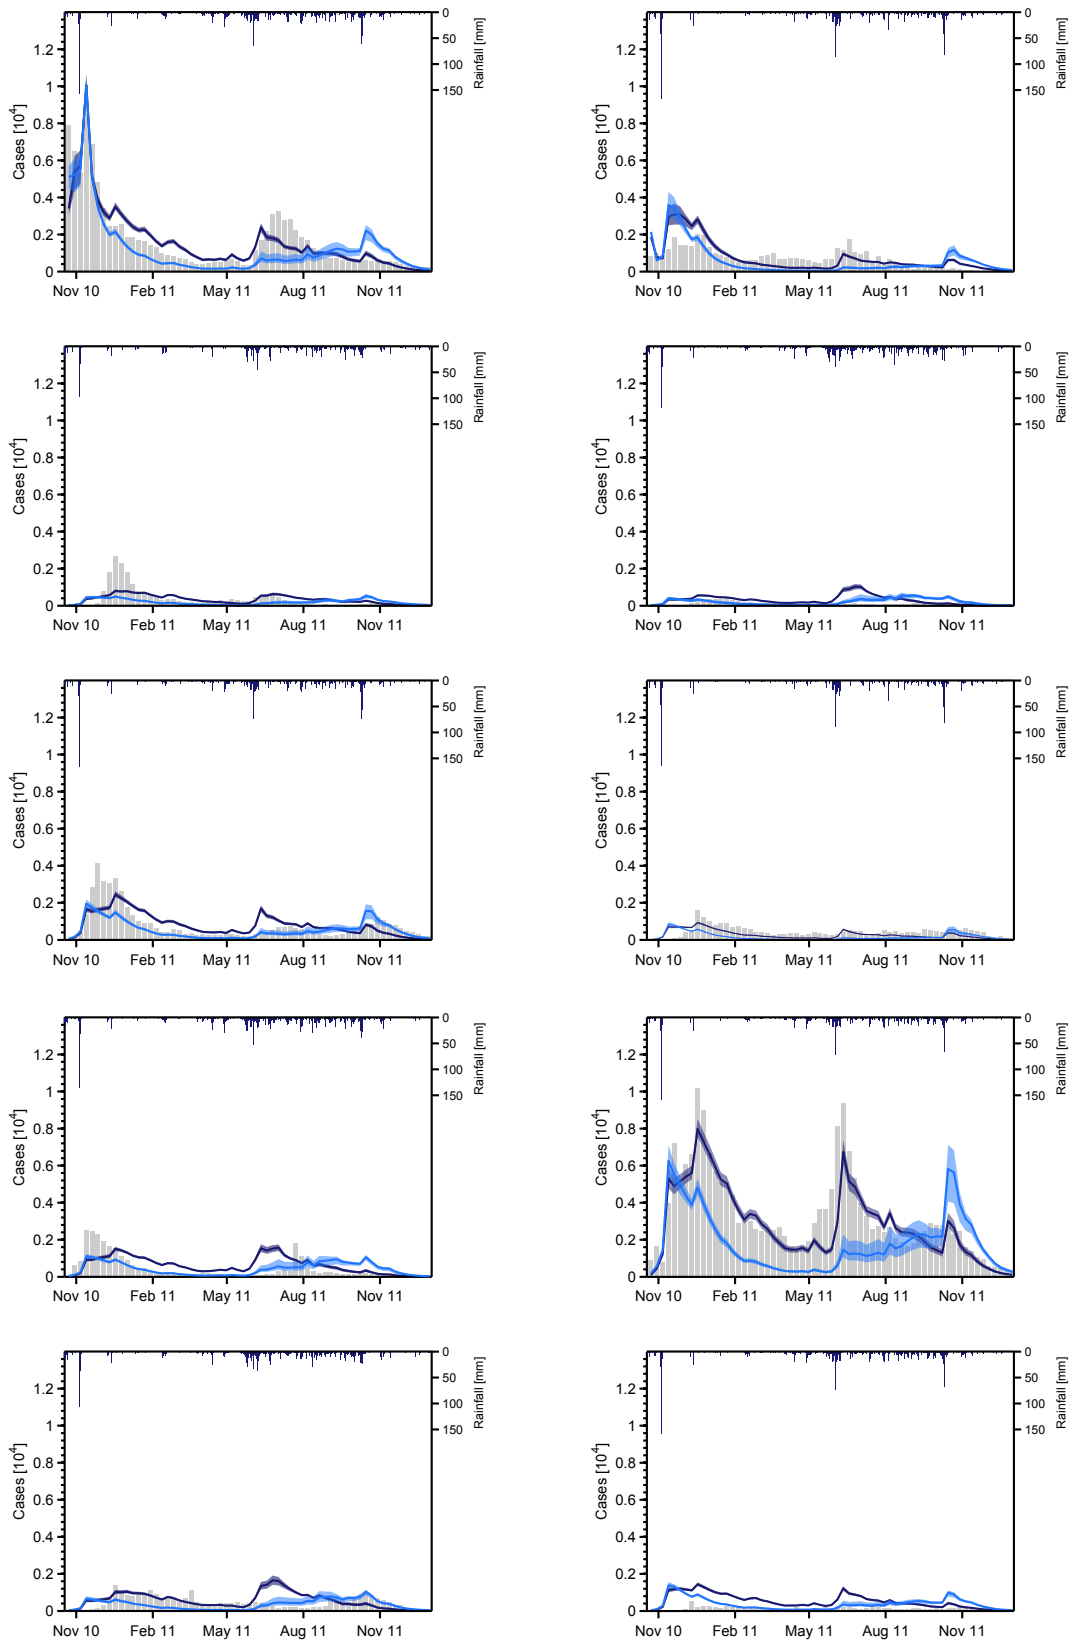

**Fig. S4**
